# Supplementary material
Source: Springer Nature journal article supplement (https://www.springermedizin.de/resource/supplementary/13075_2004_1655_MOESM1_ESM.pdf/9690272)

cell counts

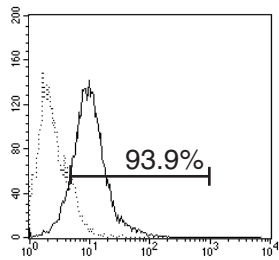

CXCR3

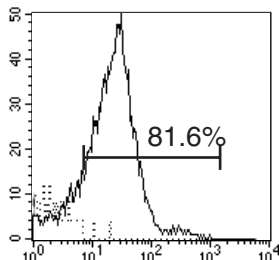

CXCR4

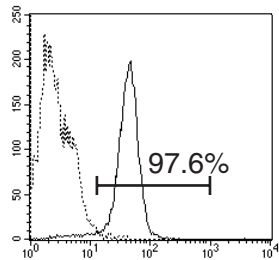

CXCR5

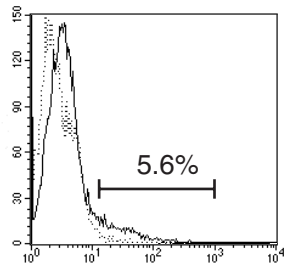

CCR5

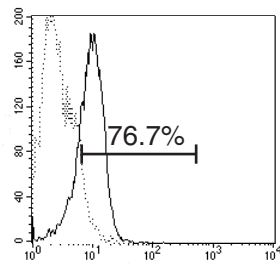

CCR6

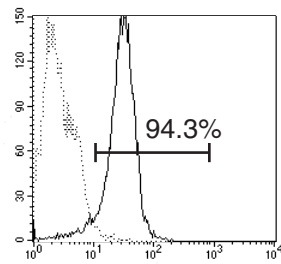

CCR7

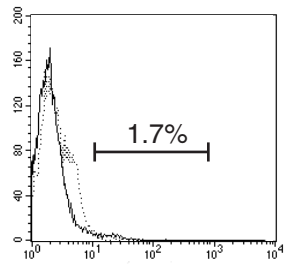

CCR9

Supplement: MOESM1 [file 9690272]
